# Supplementary material for: Immunogenomic Analyses of Advanced Serous Ovarian Cancer Reveal Immune Score is a Strong Prognostic Factor and an Indicator of Chemosensitivity
Source: Oxford University Press journal article supplement (doi:10.1158/1078-0432.ccr-17-3862), 2018-04-16
Supplement: 10780432ccr173862-sup-194768_2_supp_4655218_p67hv7.xlsx [file 10780432ccr173862-sup-194768_2_supp_4655218_p67hv7.xlsx]

## Sheet: Table S1
Supplementary Table 1. The prognostic value of 76 selected immune cell markers.
genes	HR	95CI_L	95CI_U	pvalue
GMPR	0.854717	0.807396	0.904811	6.58e-08
CCL13	0.855472	0.804759	0.909381	5.54e-07
CD38	0.861438	0.807656	0.918801	5.77e-06
MMP12	0.916317	0.881632	0.952366	9.04e-06
MAK	0.846435	0.781997	0.916183	3.68e-05
TAP1	0.899919	0.852241	0.950265	0.000146607
CCR2	0.874626	0.816018	0.937442	0.000153432
CD70	0.85405	0.786535	0.92736	0.000173494
CCR7	0.865733	0.802424	0.934037	0.000198282
IL21R	0.871102	0.809475	0.937421	0.000227643
LTK	0.82802	0.748025	0.916571	0.000272121
FADD	0.771708	0.67102	0.887505	0.000280136
TAP2	0.866821	0.801761	0.937162	0.000330337
ASB2	0.802162	0.709392	0.907063	0.00043889
GRB2	0.791842	0.694923	0.902277	0.000458832
CCL5	0.912765	0.867225	0.960695	0.000473078
CD7	0.795624	0.699897	0.904445	0.000473176
NUCB2	0.870387	0.804984	0.941104	0.000495848
ITGAL	0.860439	0.789948	0.937219	0.000567412
GPRC5C	0.887753	0.828713	0.950998	0.000696683
NKG7	0.879129	0.815259	0.948004	0.000815521
FCN1	0.863079	0.791733	0.940853	0.0008231
TIGIT	0.860255	0.787457	0.939784	0.000848116
IGSF6	0.887146	0.825413	0.953496	0.00113784
PDCD1	0.827331	0.737468	0.928144	0.00123343
UBASH3A	0.870861	0.800277	0.947671	0.00134461
LAMP3	0.925174	0.881572	0.970933	0.00159086
LCK	0.871623	0.799599	0.950134	0.00179381
AHCYL1	0.843582	0.757446	0.939514	0.00196574
AIM2	0.907747	0.853609	0.96532	0.00203585
HK3	0.830709	0.738175	0.934842	0.00208279
HLA-DMB	0.912545	0.860816	0.967382	0.0021138
GZMA	0.921165	0.873633	0.971283	0.00238217
CDC7	0.891989	0.828512	0.960329	0.00240779
CXCR4	0.911061	0.85719	0.968317	0.00274204
CD2	0.916875	0.866225	0.970486	0.00276043
SIRPG	0.879374	0.806612	0.958699	0.00353279
SLC15A3	0.895997	0.831721	0.965241	0.0038347
IRF1	0.899753	0.837501	0.966633	0.00388126
CCL18	0.934073	0.891668	0.978494	0.00401361
CD3G	0.891772	0.82435	0.964709	0.00429439
ACAP1	0.876705	0.800888	0.9597	0.00435374
FCRL3	0.8568	0.770039	0.953337	0.00455058
CD3D	0.921185	0.869958	0.975429	0.00492086
DAXX	0.821314	0.71588	0.942275	0.00498265
HLA-E	0.896967	0.831214	0.967922	0.00512086
CLECL1	0.843368	0.747292	0.951795	0.00576986
IKZF1	0.877345	0.799164	0.963174	0.00599804
BIRC5	0.913732	0.856311	0.975004	0.0064419
HAPLN3	0.855725	0.764952	0.957269	0.00646402
TAPBP	0.901458	0.835724	0.972362	0.00724229
HLA-DOA	0.912728	0.853796	0.975727	0.00732903
CD8A	0.91265	0.853545	0.975848	0.00745832
EZH2	0.905819	0.842322	0.974103	0.00764037
RAET1E	0.82645	0.718197	0.951021	0.00779018
IL2RB	0.907717	0.845059	0.97502	0.00797403
HLA-F	0.918008	0.861598	0.978111	0.008194
ICAM3	0.891804	0.818926	0.971168	0.00847424
CXCR6	0.907105	0.843498	0.975509	0.00857794
BTN3A2	0.916524	0.858823	0.978102	0.00860555
PTGS1	0.928145	0.877481	0.981734	0.00922401
LILRA5	0.821549	0.707787	0.953596	0.00974426
NOL11	0.863724	0.771712	0.966706	0.0107986
TBX21	0.879698	0.797008	0.970966	0.0109286
MMP25	0.821385	0.705685	0.956055	0.0110815
CD300LF	0.885538	0.805972	0.972959	0.0113852
CD96	0.881981	0.800074	0.972272	0.011556
TFEC	0.919372	0.860481	0.982294	0.0128142
CD6	0.886924	0.806736	0.975083	0.0130705
ACP5	0.917465	0.856482	0.98279	0.014102
MLST8	0.854863	0.754175	0.968993	0.014183
ST3GAL6	0.911722	0.84666	0.981784	0.0144192
DUSP6	0.927734	0.873041	0.985854	0.015541
CD97	0.900818	0.826845	0.981409	0.0168841
ITK	0.913527	0.848184	0.983904	0.0169176
PTGS2	0.928462	0.87355	0.986826	0.0170186

## Sheet: Table S2
Supplementary Table 2. Prognostic value of immune subpopulations
	Activated B cell		Activated CD4 T cell		Activated CD8 T cell		Central memory CD4 T cell		Central memory CD8 T cell		Effector memeory CD4 T cell		Effector memeory CD8 T cell		Gamma delta T cell		Immature B cell		Memory B cell		Regulatory T cell		T follicular helper cell		Type 1 T helper cell		Type 17 T helper cell		Type 2 T helper cell		Activated dendritic cell		CD56bright natural killer cell		CD56dim natural killer cell		Eosinophil		Immature dendritic cell		Macrophage		Mast cell		MDSC		Monocyte		Natural killer cell
	Hazard Ratio	p value	Hazard Ratio	p value	Hazard Ratio	p value	Hazard Ratio	p value	Hazard Ratio	p value	Hazard Ratio	p value	Hazard Ratio	p value	Hazard Ratio	p value	Hazard Ratio	p value	Hazard Ratio	p value	Hazard Ratio	p value	Hazard Ratio	p value	Hazard Ratio	p value	Hazard Ratio	p value	Hazard Ratio	p value	Hazard Ratio	p value	Hazard Ratio	p value	Hazard Ratio	p value	Hazard Ratio	p value	Hazard Ratio	p value	Hazard Ratio	p value	Hazard Ratio	p value	Hazard Ratio	p value	Hazard Ratio	p value	Hazard Ratio
E.MTAB.386	0.92164	0.49166	0.792013	0.0597571	0.77766	0.0421704	0.924944	0.518923	0.895937	0.347052	0.840935	0.165802	0.809188	0.0869719	0.838404	0.141987	0.82273	0.101008	0.895744	0.348089	0.863657	0.225468	0.882283	0.288527	0.8622	0.218643	0.869761	0.242942	0.98448	0.894133	0.763319	0.0233208	0.927686	0.525814	0.901096	0.386431	1.13505	0.259985	1.08823	0.432109	0.915607	0.482143	0.944924	0.610714	0.893893	0.366887	0.984262	0.891166	0.826233
GSE13876	0.819517	0.0605542	0.833388	0.0579307	0.850185	0.0987809	0.951541	0.607264	0.948353	0.590946	0.968762	0.740496	0.89189	0.205567	0.95143	0.59649	0.940006	0.509257	0.936287	0.509651	0.845284	0.0955133	0.816645	0.0418494	0.80141	0.0278293	0.933523	0.477932	1.04178	0.663943	0.857673	0.100205	0.928207	0.473259	1.00191	0.984097	0.705867	0.00236777	0.905791	0.341137	0.785303	0.0164006	0.982963	0.857073	0.885434	0.199957	0.927287	0.417985	0.954484
GSE14764	1.11196	0.552774	0.986452	0.951327	0.970002	0.888923	0.914127	0.676331	1.13728	0.592663	0.969932	0.883729	0.95985	0.860083	0.961532	0.863861	1.02348	0.920083	0.854424	0.491273	1.13959	0.539685	0.997024	0.989348	1.04623	0.824268	0.870891	0.55638	0.910509	0.699544	1.28276	0.278055	1.11813	0.590557	0.93637	0.773863	0.946473	0.813149	0.703695	0.254815	0.959516	0.861361	1.04916	0.825969	1.07659	0.755012	0.963359	0.86134	0.953846
GSE17260	0.899531	0.523371	0.879495	0.395592	0.838467	0.258482	0.81773	0.193174	0.914889	0.555268	1.06775	0.667742	0.87862	0.384616	1.06596	0.65941	1.06327	0.682033	0.808487	0.199587	0.970471	0.844271	0.834067	0.247443	0.902098	0.50016	0.900749	0.473739	0.86976	0.347843	0.875279	0.366003	0.920402	0.570342	0.970239	0.848399	0.944273	0.705016	0.85823	0.303518	0.90642	0.511919	1.04379	0.780837	1.0206	0.893978	1.10182	0.512037	0.875056
GSE18520	0.760631	0.119792	0.826476	0.254506	0.946812	0.729982	0.795681	0.164352	1.00204	0.989961	1.0758	0.661802	0.716199	0.0372658	1.03575	0.840104	0.968195	0.838656	0.713051	0.0351182	0.994935	0.976452	0.869555	0.402246	0.86238	0.387045	1.08175	0.648719	1.03264	0.839827	0.826429	0.249194	0.886847	0.465303	1.21421	0.258234	1.0439	0.801258	0.882835	0.506326	0.939989	0.701157	0.936172	0.696132	0.891126	0.470768	1.02022	0.90525	0.976615
GSE26193	1.04796	0.746113	0.990553	0.946726	1.0242	0.871231	1.09977	0.499189	1.08547	0.557809	0.968927	0.823085	1.03878	0.777329	0.903826	0.4761	1.06292	0.644701	1.04881	0.732227	0.987002	0.919853	0.975352	0.862099	0.986834	0.925047	1.13174	0.494112	0.936792	0.654564	1.04799	0.728867	1.0836	0.562356	1.071	0.629904	1.51724	0.0106758	1.07573	0.574257	0.983036	0.893102	1.12499	0.496228	0.950172	0.696582	1.34707	0.069913	1.17064
GSE26712	0.948903	0.547411	0.937865	0.468226	0.97117	0.721592	0.988684	0.890678	1.05537	0.53543	0.821204	0.0201189	0.861591	0.0795401	1.0173	0.852839	0.899341	0.212938	1.15213	0.129621	0.983654	0.854953	0.979593	0.812874	0.950945	0.568856	0.962714	0.674191	1.1557	0.0759466	0.94628	0.542348	0.923558	0.343177	0.950668	0.548817	1.13726	0.151514	1.24622	0.0203737	0.942582	0.51412	0.966008	0.693455	0.918029	0.340791	0.902246	0.238594	0.926566
GSE30161	0.598381	0.0105089	0.793703	0.225246	0.682522	0.0472653	1.0297	0.875107	1.02493	0.898973	0.74841	0.133429	0.72081	0.0832954	0.641994	0.0216209	0.783026	0.180128	0.889328	0.540169	0.65823	0.0261484	0.726558	0.0921134	0.665097	0.020817	0.679336	0.0490626	0.878008	0.440072	1.01261	0.950756	0.756309	0.1231	0.663711	0.0381293	0.88479	0.458987	0.855001	0.387937	0.648813	0.0336955	0.802185	0.208957	0.744988	0.0907956	0.619263	0.0192972	0.615763
GSE32062	0.793117	0.0262719	0.748391	0.00135745	0.763938	0.00440901	0.769476	0.00493368	0.835964	0.0514687	0.791159	0.00825052	0.766246	0.000898093	0.774734	0.00863668	0.82834	0.0512216	0.939135	0.524015	0.816989	0.030466	0.720481	0.000693896	0.786142	0.00832432	0.860265	0.0883944	0.724224	0.000730989	0.77174	0.00274472	0.757536	0.00490397	0.779249	0.0101751	0.851436	0.0914355	0.785945	0.0138959	0.764454	0.00237458	0.84967	0.104082	0.763691	0.00268053	0.798196	0.0336838	0.841355
GSE32063	1.74717	0.0143536	1.66899	0.0235457	1.55258	0.0473269	1.64879	0.021978	1.28483	0.225901	1.43567	0.182232	1.50291	0.0685834	1.29117	0.278338	1.49029	0.0440619	1.66109	0.0352764	1.44553	0.0749265	1.20927	0.340447	1.66361	0.0216344	1.09763	0.647168	1.60577	0.0404013	1.50144	0.0624983	1.20271	0.456409	1.63513	0.0302459	1.54912	0.0561626	1.27144	0.246436	1.39473	0.108263	1.28971	0.278378	1.5395	0.0419083	1.16088	0.562196	1.72267
GSE49997	1.1641	0.290355	0.972143	0.838611	1.21841	0.178531	1.31439	0.0724529	1.22836	0.194871	0.88546	0.415707	1.16347	0.328972	1.00075	0.995911	1.05371	0.718012	1.23439	0.16552	1.44121	0.018936	1.38336	0.0252471	1.07126	0.635499	0.947301	0.705133	0.968931	0.83012	1.12252	0.432429	0.924729	0.60697	0.936868	0.673193	0.938382	0.677505	1.393	0.0213269	1.23793	0.161009	1.28443	0.108353	1.20814	0.209948	1.13763	0.405867	0.92639
GSE9891	0.893445	0.233752	0.97073	0.745615	0.98513	0.868831	0.922149	0.402289	0.934189	0.455919	0.97844	0.817017	0.980324	0.831497	0.958887	0.647239	0.852352	0.099976	0.948251	0.601594	1.01862	0.83779	0.949375	0.576654	0.983055	0.849714	0.912142	0.33314	0.953387	0.611298	0.968573	0.726015	0.907684	0.295583	0.91444	0.342148	0.972342	0.755975	1.02843	0.765036	0.949387	0.556554	0.932214	0.446577	0.986141	0.881678	0.937681	0.488214	0.962498
Dressman et.al	1.20144	0.111975	0.809648	0.110121	1.05681	0.650425	1.23842	0.100289	0.981418	0.883096	1.10759	0.40221	0.938802	0.615193	1.23346	0.0796619	0.973975	0.833163	1.06982	0.603721	1.16663	0.20992	0.977532	0.861841	1.18475	0.181769	1.35952	0.0137113	1.01456	0.904109	0.950161	0.671603	1.04738	0.69194	1.64127	0.000241953	1.09363	0.463483	0.949166	0.660997	1.18706	0.163967	1.652	0.000160599	0.941305	0.627714	1.1824	0.162285	1.24741
TCGA	0.869101	0.0205308	0.993874	0.913078	0.912242	0.127067	0.992247	0.894179	1.06137	0.335112	0.959631	0.470916	1.02616	0.647208	0.996577	0.954719	1.0334	0.573614	0.995578	0.943472	1.08597	0.173283	0.973894	0.658045	0.965874	0.543961	0.980144	0.731	1.02595	0.658897	1.05412	0.382626	0.931345	0.227872	0.983181	0.777492	1.10686	0.0987042	1.1388	0.0314235	1.02683	0.656433	1.09046	0.165196	1.03723	0.542787	0.909833	0.124681	0.985206
GSE51088	1.00284	0.980824	1.15792	0.216802	0.990245	0.935317	1.22155	0.0906957	1.01938	0.867699	0.787327	0.033739	1.08772	0.502204	1.1457	0.271595	1.11841	0.363635	0.921377	0.465352	1.21728	0.100837	1.10931	0.407714	1.12359	0.317013	0.986548	0.910235	1.16829	0.190797	1.10863	0.384356	1.21776	0.0812181	NA	NA	1.27609	0.044337	1.14404	0.27398	0.984416	0.888595	1.22248	0.082844	1.11558	0.401885	1.14336	0.265597	1.23364
OV.AU	0.856958	0.22711	0.813851	0.092485	0.842824	0.139562	1.00778	0.949393	0.939349	0.61803	1.07191	0.55965	0.805815	0.075846	0.913676	0.470137	0.899198	0.367638	1.00654	0.960428	0.953551	0.684541	0.907539	0.415902	0.883272	0.300844	0.955687	0.723108	0.921429	0.542187	0.91113	0.442027	0.755239	0.0221954	0.726391	0.0169885	0.796538	0.0653738	0.778401	0.0437323	0.888467	0.330556	0.90668	0.418973	0.916734	0.457794	0.86639	0.289522	0.869435
Overall prognostic value	0.9212	0.00421001	0.918632	0.00220128	0.920643	0.00311217	0.986911	0.637799	0.994785	0.85341	0.927264	0.00623646	0.922208	0.00289885	0.968281	0.256765	0.95897	0.131856	0.983096	0.559221	1.00471	0.867493	0.934368	0.0165943	0.941678	0.0301923	0.959055	0.13867	0.994384	0.839099	0.953458	0.0867939	0.92915	0.00856468	0.964151	0.214713	1.02305	0.427975	1.02657	0.357916	0.947001	0.0506081	1.02976	0.306327	0.955906	0.108354	0.958358	0.140106	0.966513
[truncated: 7 more columns]
